# Supplementary material for: Sol-Gel Dipping Devices for H2S Visualization
Source: Sensors (Basel). 2023 Feb 10;23(4):2023. doi: 10.3390/s23042023 (PMC9965526; doi:10.3390/s23042023)
Supplement: Supplementary file 1 [file sensors-23-02023-s001.zip]

Archive with 17 entries (17 files):
- Figure S1.pdf
- Figure S10.pdf
- Figure S11.pdf
- Figure S12.pdf
- Figure S13.pdf
- Figure S14.pdf
- Figure S15.pdf
- Figure S16.pdf
- Figure S17.pdf
- Figure S18.pdf
- Figure S2.pdf
- Figure S3.pdf
- Figure S4.pdf
- Figure S5.pdf
- Figure S6.pdf
- Figure S7.pdf
- Figure S8.pdf
