# Supplementary material for: Sol-Gel Dipping Devices for H2S Visualization
Source: Sensors (Basel). 2023 Feb 10;23(4):2023. doi: 10.3390/s23042023 (PMC9965526; doi:10.3390/s23042023)
Supplement: Supplementary file 1 [file sensors-23-02023-s001.zip › Figure S3.pdf]

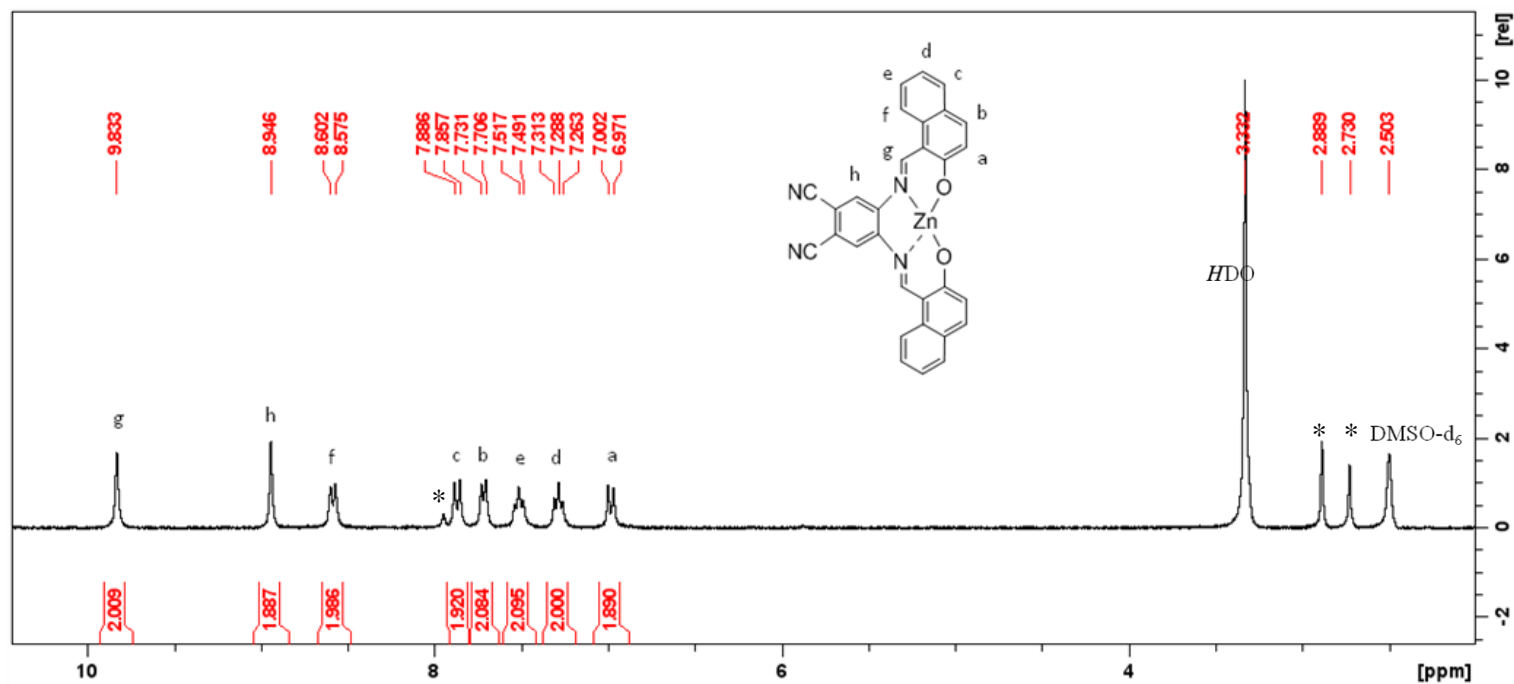

**Figure S3.**  $^1\text{H}$  NMR spectrum of complex **3** in  $\text{DMSO-d}_6$ .  $[\text{complex } \mathbf{3}] = 50 \times 10^{-3} \text{ M}$ . \* = DMF used for the synthesis.
