# Supplementary material for: Sol-Gel Dipping Devices for H2S Visualization
Source: Sensors (Basel). 2023 Feb 10;23(4):2023. doi: 10.3390/s23042023 (PMC9965526; doi:10.3390/s23042023)
Supplement: Supplementary file 1 [file sensors-23-02023-s001.zip › Figure S6.pdf]

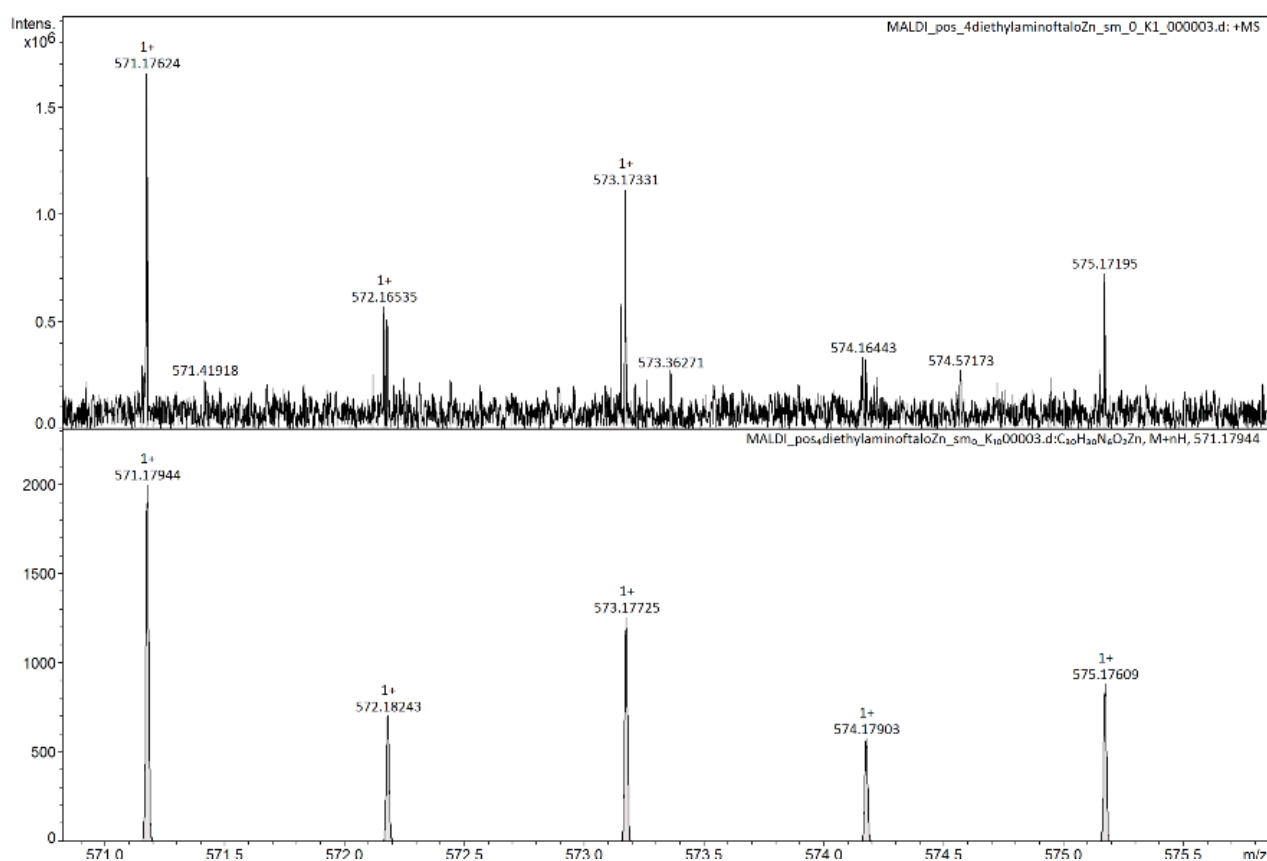

**Figure S6.** Enlargement of a region of the MALDI spectrum of complex **2** in MeOH. The upper trace is the experimental trace whereas the lower is the theoretical one.
