# Supplementary material for: Sol-Gel Dipping Devices for H2S Visualization
Source: Sensors (Basel). 2023 Feb 10;23(4):2023. doi: 10.3390/s23042023 (PMC9965526; doi:10.3390/s23042023)
Supplement: Supplementary file 1 [file sensors-23-02023-s001.zip › Figure S13.pdf]

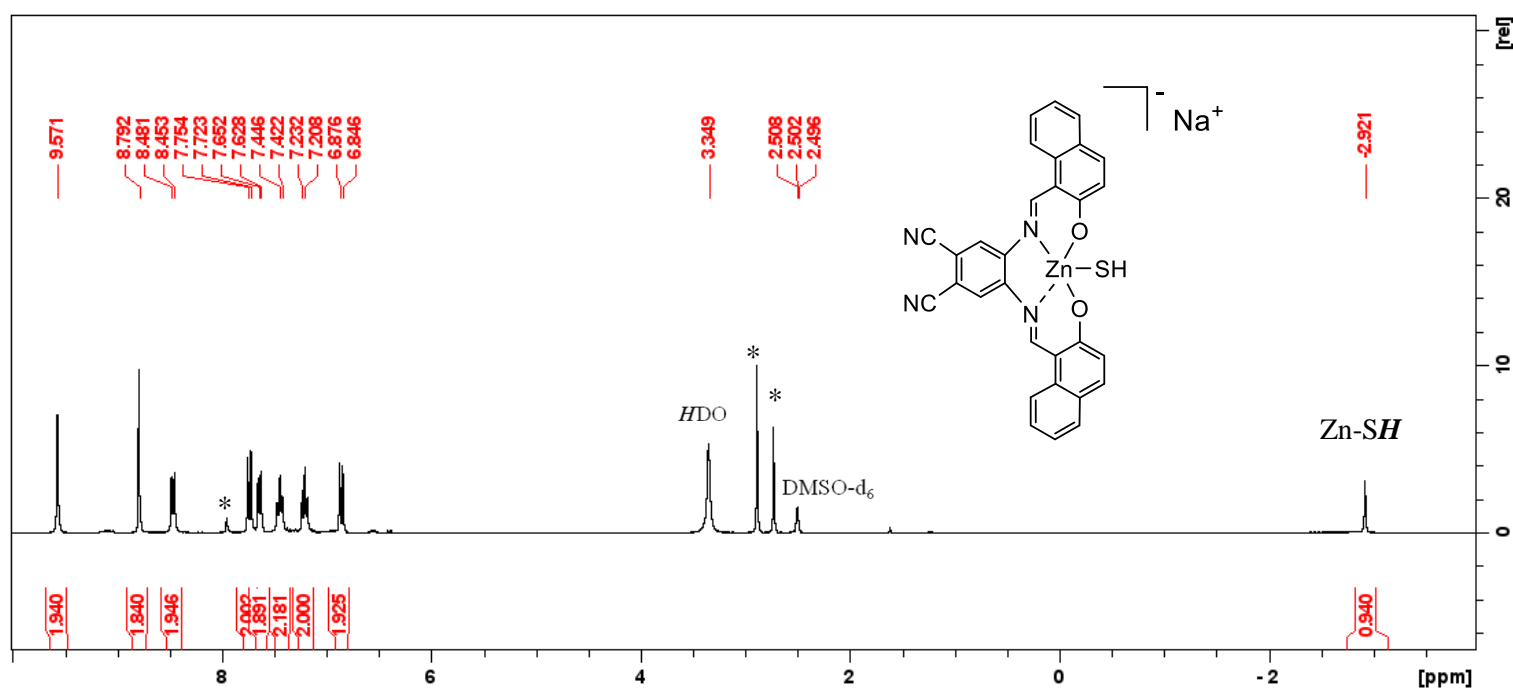

**Figure S13.**  $^1\text{H}$  NMR spectrum of complex **3** in  $\text{DMSO-d}_6$  after the addition of an excess of  $\text{HS}^-$ .  $[\text{complex } \mathbf{3}] = 5 \times 10^{-2} \text{ M}$ ;  $[\text{NaSH}] = 0.1 \text{ M}$ . \* = DMF used for the synthesis.
