# Supplementary material for: Sol-Gel Dipping Devices for H2S Visualization
Source: Sensors (Basel). 2023 Feb 10;23(4):2023. doi: 10.3390/s23042023 (PMC9965526; doi:10.3390/s23042023)
Supplement: Supplementary file 1 [file sensors-23-02023-s001.zip › Figure S14.pdf]

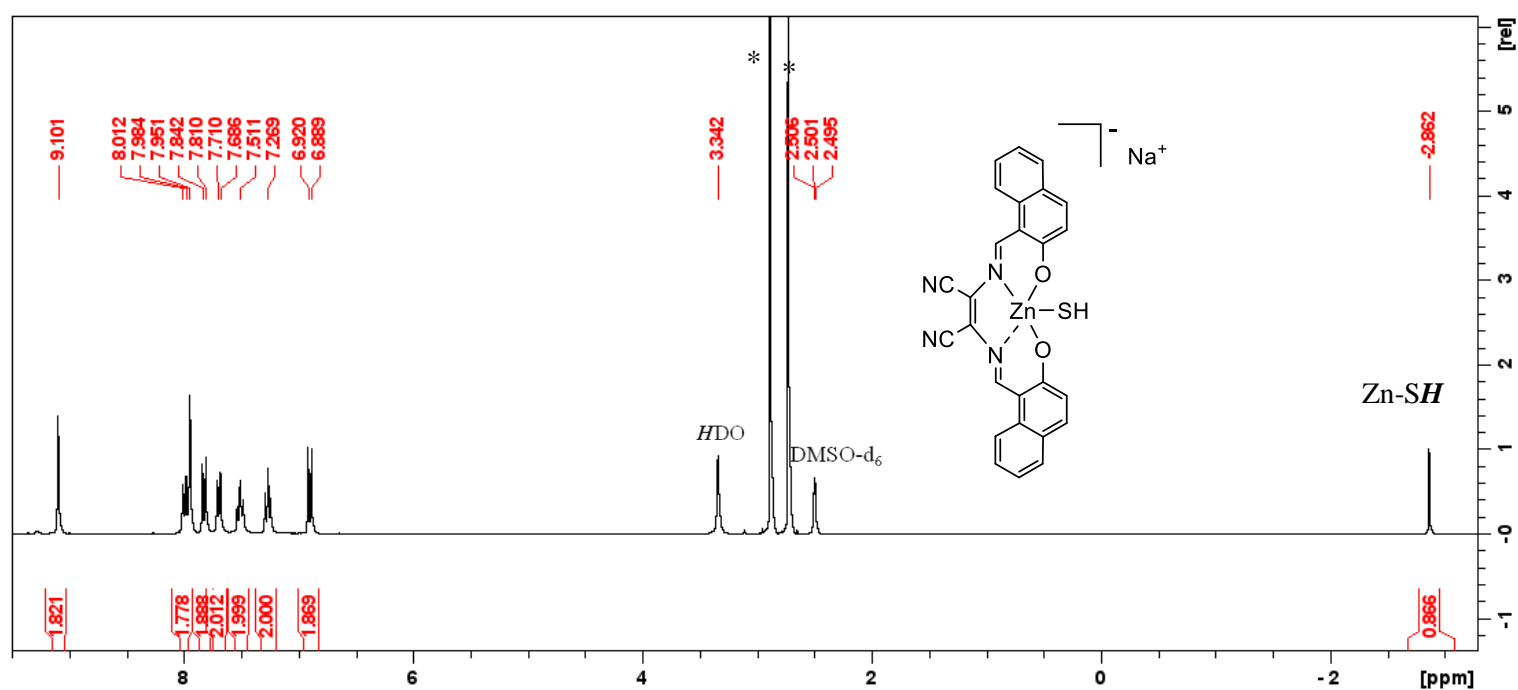

**Figure S14.** <sup>1</sup>H NMR spectrum of complex **4** in DMSO-d<sub>6</sub> after the addition of an excess of HS<sup>-</sup>. [complex **4**] = 5×10<sup>-2</sup> M; [NaSH] = 0.1 M. \* = DMF used for the synthesis.
